# Supplementary material for: Tuning the magnetic properties of transition metal MOFs by metal–oxygen condensation control: the relation between synthesis temperature, SBU nuclearity and carboxylate geometry
Source: Royal Society of Chemistry journal article supplement (doi:10.1039/c2ce06563k), 2012-01-01
Supplement: c2ce06563k.pdf [file c2ce06563k.pdf]

## Supporting Information for

# Tuning the magnetic properties of transition metal MOFs by the metal-oxygen condensation control: the relation between synthesis temperature, SBU nuclearity and carboxylate geometry

*Maria C. Bernini<sup>a,b</sup>, Ana E. Platero-Prats<sup>a</sup>, Natalia Snejko<sup>a</sup>, Enrique Gutierrez-Puebla<sup>a</sup>,  
Ana Labrador<sup>c</sup>, Regino Sáez-Puche<sup>d</sup>, Julio Romero de Paz<sup>e</sup>, M. Angeles Monge<sup>a,\*</sup>.*

<sup>a</sup> *Instituto de Ciencia de Materiales de Madrid, ICMM-CSIC, Madrid, Spain. E-mail:  
amonge@icmm.csic.es*

<sup>b</sup> *Área de Química General e Inorgánica “Dr. G.F. Puelles” Facultad de Química,  
Bioquímica y Farmacia, Chacabuco y Pedernera, Universidad Nacional de San Luis,  
5700 San Luis, Argentina.*

<sup>c</sup> *BM16-LLS European Synchrotron Radiation Facility, 6 Rue Jules Horowitz-BP  
2208043 Grenoble CEDEX 9, France.*

<sup>d</sup> *Departamento de Química Inorgánica, Facultad de Ciencias Químicas, Universidad  
Complutense de Madrid, Ciudad Universitaria s/n, 28040-Madrid, Spain.*

<sup>e</sup> *C.A.I. Técnicas Físicas, Facultad de Ciencias Físicas, Universidad Complutense de  
Madrid, Ciudad Universitaria s/n, 28040-Madrid, Spain.*

## Experimental

**Synthesis of [Co<sub>2</sub>(hfipbb)<sub>2</sub>(H<sub>2</sub>hfipbb)] (3):** This compound was obtained by reaction of 1 mmol of CoCl<sub>2</sub>·6H<sub>2</sub>O with 0.8 mmol of H<sub>2</sub>hfipbb in 6 mL of water with addition of 0.05 mL of TEA. This mixture was heated in a Teflon-lined digestion bomb at 170 °C during 6 days and then cooled to room temperature. Dark gray prismatic crystals were collected after washing with distilled water and acetone. In such conditions the obtained yield is 30.47 %. If the amount of TEA is augmented to 0.15 mL, the resultant yield is 57.26 % the obtained crystals being of bigger size.

The comparison between simulated and experimental XRD powder patterns (see Figures S1-S3) along with the results of elemental analysis allowed for verifying the purity of all compounds.

**Table S1.** Main crystallographic and refinement data for compound **3**.

|                                                       | <b>Compound 3</b>                                                                  |
|-------------------------------------------------------|------------------------------------------------------------------------------------|
| Formula                                               | [Co <sub>2</sub> C <sub>51</sub> H <sub>25</sub> O <sub>12</sub> F <sub>18</sub> ] |
| Temperature (K)                                       | 273(2)                                                                             |
| Molecular weight/gmol <sup>-1</sup>                   | 1290.58                                                                            |
| Crystal system                                        | Monoclinic                                                                         |
| Space Group                                           | <i>P2/n</i>                                                                        |
| <i>a</i> /Å                                           | 19.030(1)                                                                          |
| <i>b</i> /Å                                           | 7.2336(5)                                                                          |
| <i>c</i> /Å                                           | 20.500(1)                                                                          |
| <i>α</i> /°                                           | 90                                                                                 |
| <i>β</i> /°                                           | 106.6290(10)                                                                       |
| <i>γ</i> /°                                           | 90                                                                                 |
| <i>V</i> /Å <sup>3</sup>                              | 2704.0(3)                                                                          |
| <i>Z</i>                                              | 2                                                                                  |
| Calc. dens/g cm <sup>-3</sup>                         | 1.585                                                                              |
| <i>μ</i> /mm <sup>-1</sup>                            | 0.735                                                                              |
| Dimensions (mm)                                       | 0.6 x 0.4 x 0.2                                                                    |
| Limiting indices                                      | -22 < <i>h</i> < 22<br>-8 < <i>k</i> < 8<br>-24 < <i>l</i> < 24                    |
| F(000)                                                | 1288                                                                               |
| Refl. collected/unique with <i>I</i> > 2σ( <i>I</i> ) | 4666/3854                                                                          |
| Refined parameters                                    | 379                                                                                |
| Goodness-of-fit on F <sup>2</sup>                     | 1.058                                                                              |
| <i>R</i> <sub>1</sub>                                 | 0.0461                                                                             |
| <i>wR</i> <sub>2</sub>                                | 0.1279                                                                             |
| <i>R</i> -factor-all                                  | 0.0583                                                                             |

**Table S2.** Crystal data and Rietveld refinement values for compound **1a**.

| <b>Compound</b>             | <b>1a</b>                   |                          |
|-----------------------------|-----------------------------|--------------------------|
| <b>Crystal system</b>       | Monoclinic                  |                          |
| <b>Space group</b>          | $P2_1/c$                    |                          |
| <b>Unit cell dimensions</b> | $a = 7.316(2) \text{ \AA}$  | $\alpha = 90^\circ$      |
|                             | $b = 32.023(5) \text{ \AA}$ | $\beta = 99.91(2)^\circ$ |
|                             | $c = 16.533(3) \text{ \AA}$ | $\gamma = 90^\circ$      |
| <b>Profile Function</b>     | Pseudo-Voigt                |                          |
| <b>U</b>                    | 0.31(7)                     |                          |
| <b>V</b>                    | -0.07(1)                    |                          |
| <b>W</b>                    | 0.005(6)                    |                          |
| <b>NA</b>                   | 0.88(9)                     |                          |
| <b>NB</b>                   | -0.02(1)                    |                          |
| <b>Zero Point</b>           | 0.1052(8)                   |                          |
| <b>Asymmetry correction</b> | Finger-Cox-Jephcoat         |                          |
| <b>H/L</b>                  | 0.0141(2)                   |                          |
| <b>S/L</b>                  | 0.0146(2)                   |                          |
| <b>R<sub>wp</sub></b>       | 0.0828                      |                          |
| <b>R<sub>p</sub></b>        | 0.1996                      |                          |

**Table S3.** Crystal data and Rietveld refinement values for compound **1b**.

| <b>Compound</b>             | <b>1b</b>                                                                                                                                                 |
|-----------------------------|-----------------------------------------------------------------------------------------------------------------------------------------------------------|
| <b>Crystal system</b>       | Monoclinic                                                                                                                                                |
| <b>Space group</b>          | $P2_1/c$                                                                                                                                                  |
| <b>Unit cell dimensions</b> | $a = 7.127(1) \text{ \AA}$ $\alpha = 90^\circ$<br>$b = 31.803(4) \text{ \AA}$ $\beta = 99.89(2)^\circ$<br>$c = 16.424(2) \text{ \AA}$ $\gamma = 90^\circ$ |
| <b>Profile Function</b>     | Pseudo-Voigt                                                                                                                                              |
| <b>U</b>                    | 0.4(1)                                                                                                                                                    |
| <b>V</b>                    | -0.08(2)                                                                                                                                                  |
| <b>W</b>                    | 0.0070(7)                                                                                                                                                 |
| <b>NA</b>                   | 0.81(8)                                                                                                                                                   |
| <b>NB</b>                   | 0.002(8)                                                                                                                                                  |
| <b>Zero Point</b>           | 0.1178(8)                                                                                                                                                 |
| <b>Asymmetry correction</b> | Finger-Cox-Jephcoat                                                                                                                                       |
| <b>H/L</b>                  | 0.0164(2)                                                                                                                                                 |
| <b>S/L</b>                  | 0.0159(2)                                                                                                                                                 |
| <b>R<sub>wp</sub></b>       | 0.1444                                                                                                                                                    |
| <b>R<sub>p</sub></b>        | 0.2925                                                                                                                                                    |

**Table S4.** Crystal data and Rietveld refinement values for compound **1c**.

| Compound             | <b>1c</b>                   |                          |
|----------------------|-----------------------------|--------------------------|
| Crystal system       | Monoclinic                  |                          |
| Space group          | $P2_1/c$                    |                          |
| Unit cell dimensions | $a = 7.085(2) \text{ \AA}$  | $\alpha = 90^\circ$      |
|                      | $b = 31.766(7) \text{ \AA}$ | $\beta = 99.78(4)^\circ$ |
|                      | $c = 16.404(4) \text{ \AA}$ | $\gamma = 90^\circ$      |
| Profile Function     | Pseudo-Voigt                |                          |
| U                    | 2.9(3)                      |                          |
| V                    | 0.56(6)                     |                          |
| W                    | 0.032(2)                    |                          |
| NA                   | 0.92(8)                     |                          |
| NB                   | -0.031(7)                   |                          |
| Zero Point           | 0.107(2)                    |                          |
| Asymmetry corrector  | Finger-Cox-Jephcoat         |                          |
| H/L                  | 0.01(1)                     |                          |
| S/L                  | 0.02(1)                     |                          |
| $R_{wp}$             | 0.1516                      |                          |
| $R_p$                | 0.2495                      |                          |

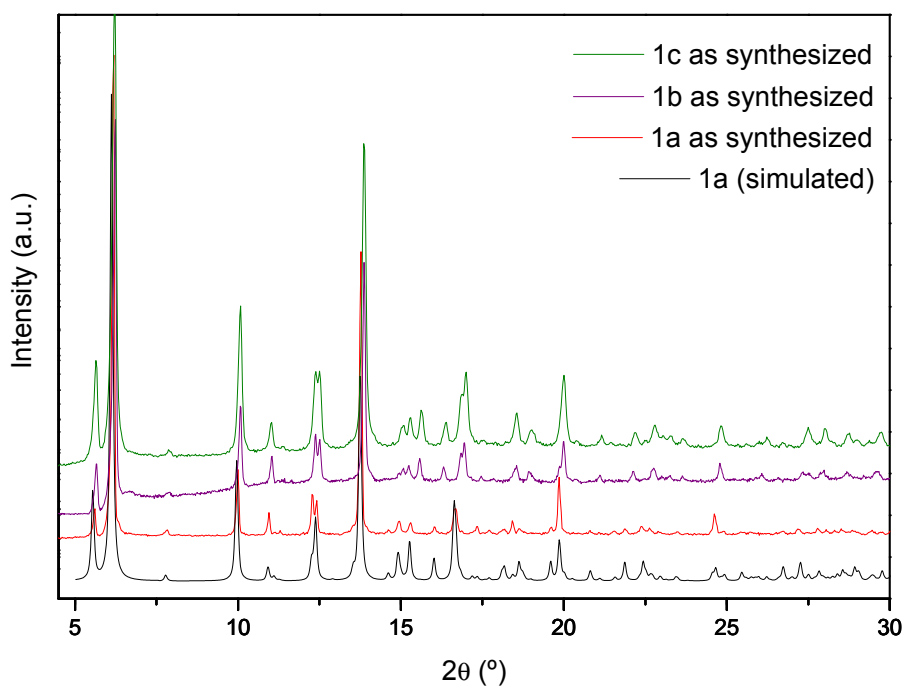

**Figure S1.** Comparison of simulated XRD powder pattern of compound **1a** with the corresponding experimental ones for **1a-c** compounds.

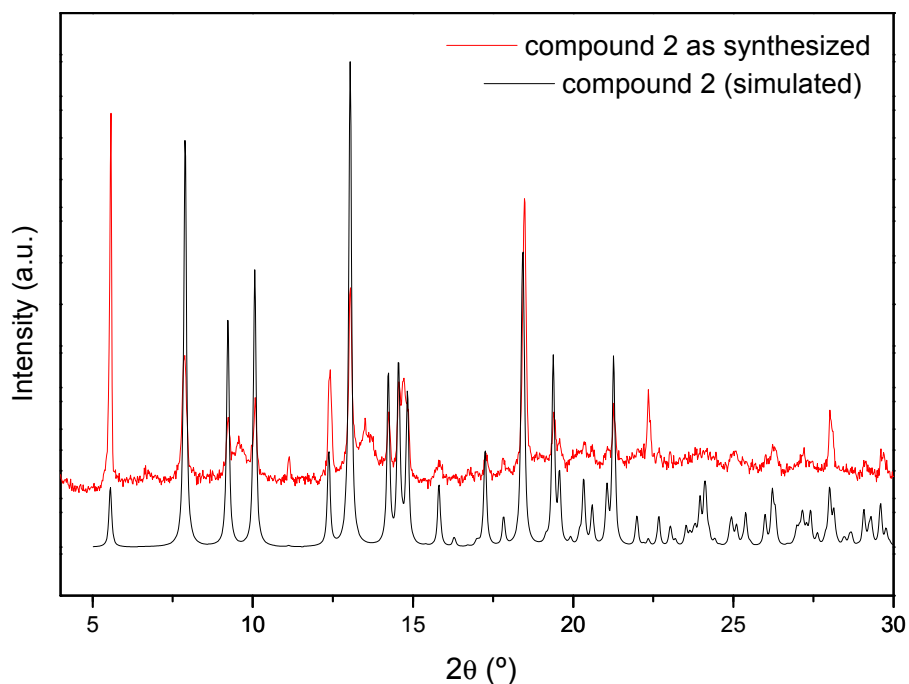

**Figure S2.** Comparison of simulated XRD powder pattern of compound **2** with the corresponding experimental one.

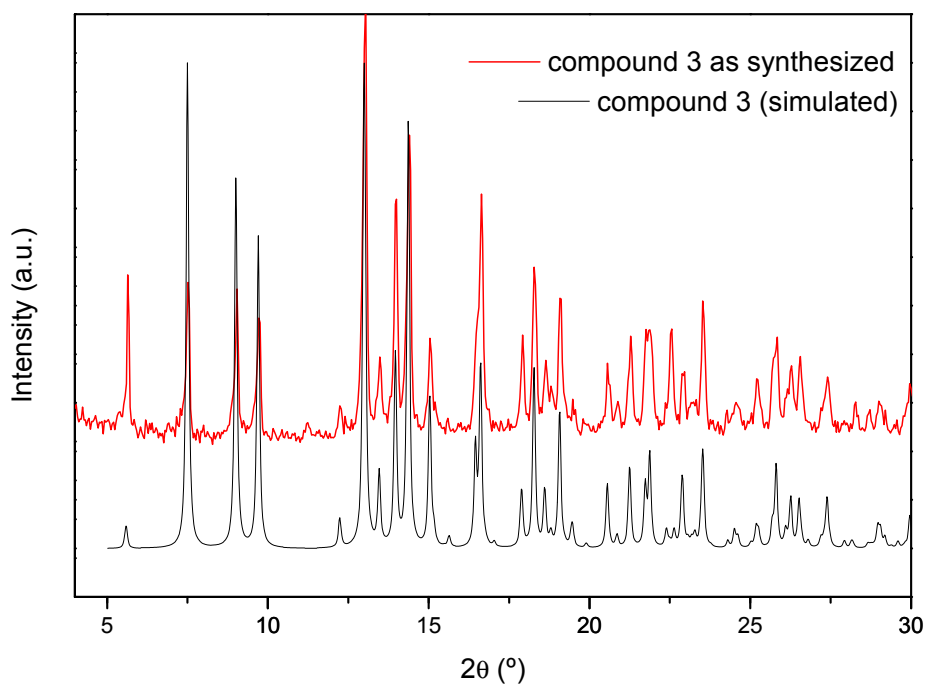

**Figure S3.** Comparison of simulated XRD powder pattern of compound **3** with the corresponding experimental one.

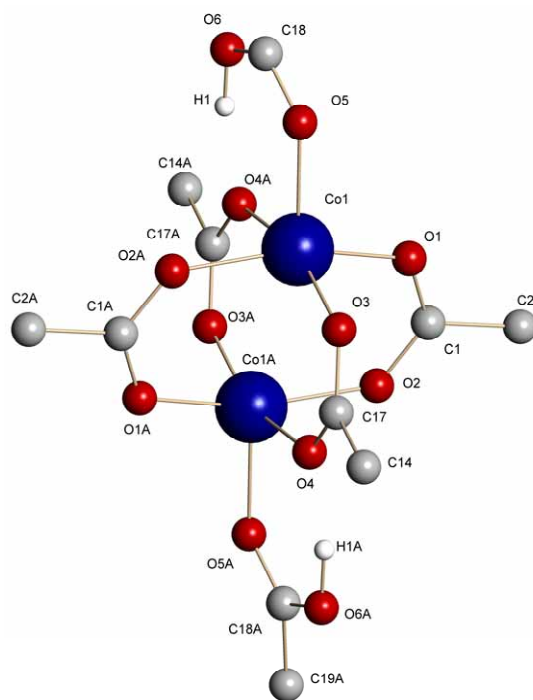

**Figure S4.** Coordination sphere of Co(II) ions in compound **3**.

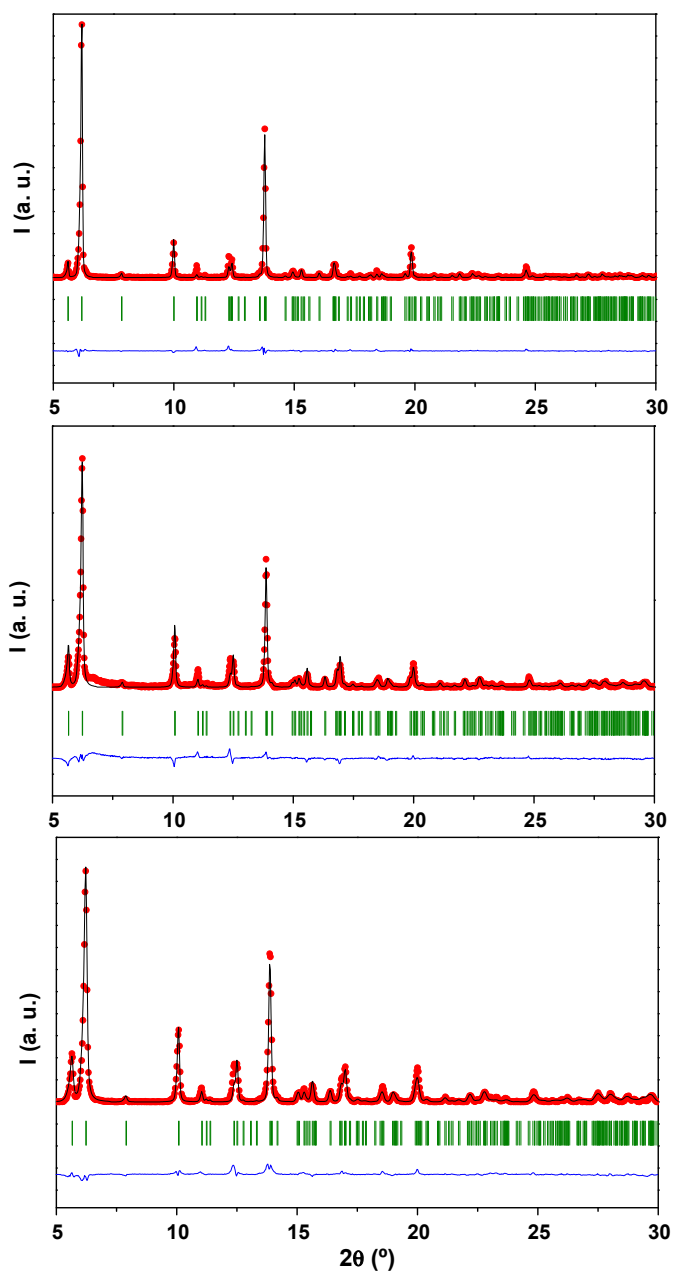

**Figure S5.** Rietveld analysis for compounds **1a** (up), **1b** (middle) and **1c** (down).



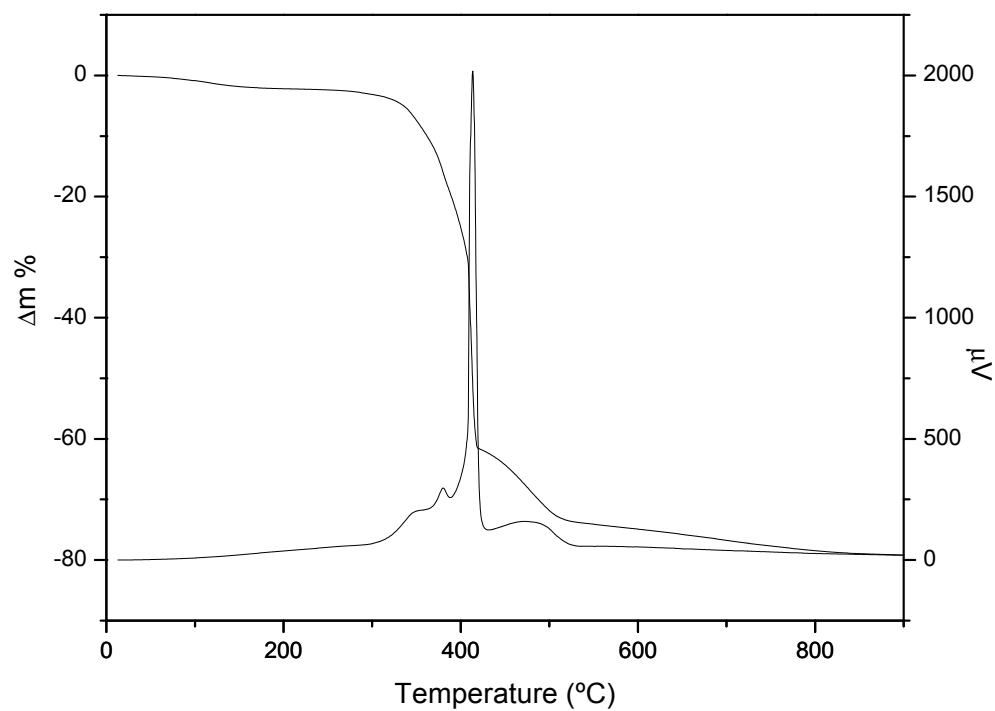

**Figure S6.** TGA/DTA curves for compound **1a**.

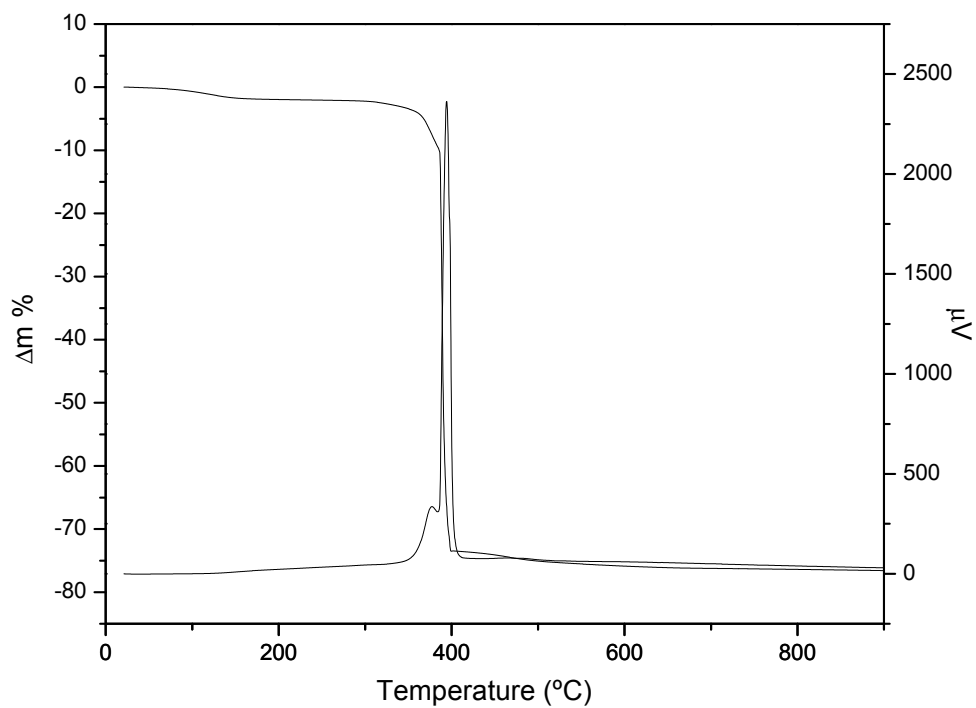

**Figure S7.** TGA/DTA curves for compound **1b**.

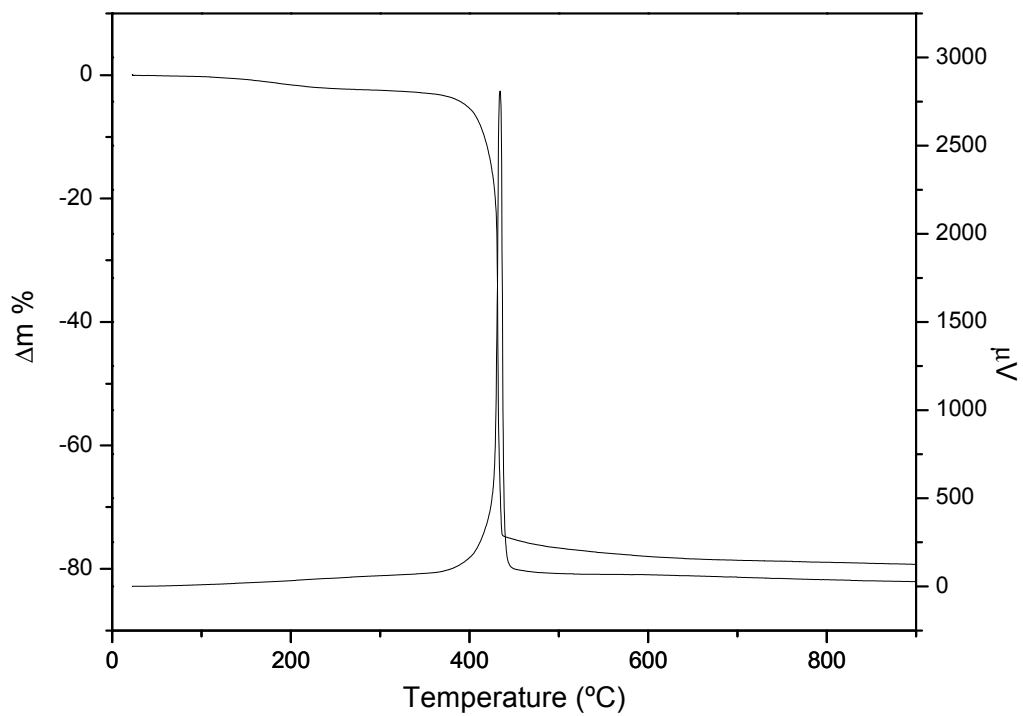

**Figure S8.** TGA/DTA curves for compound **1c**.

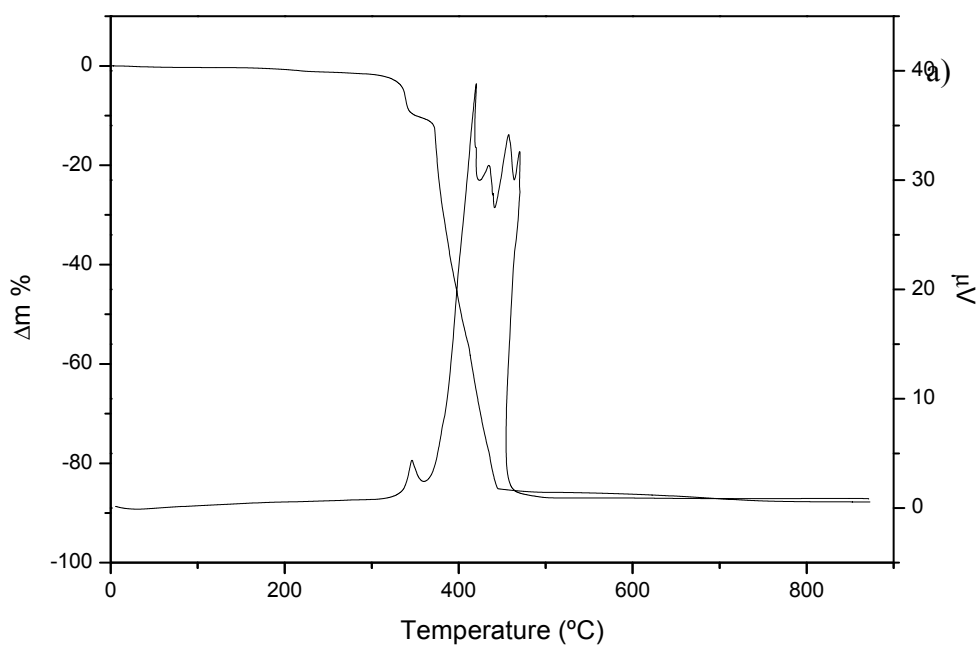

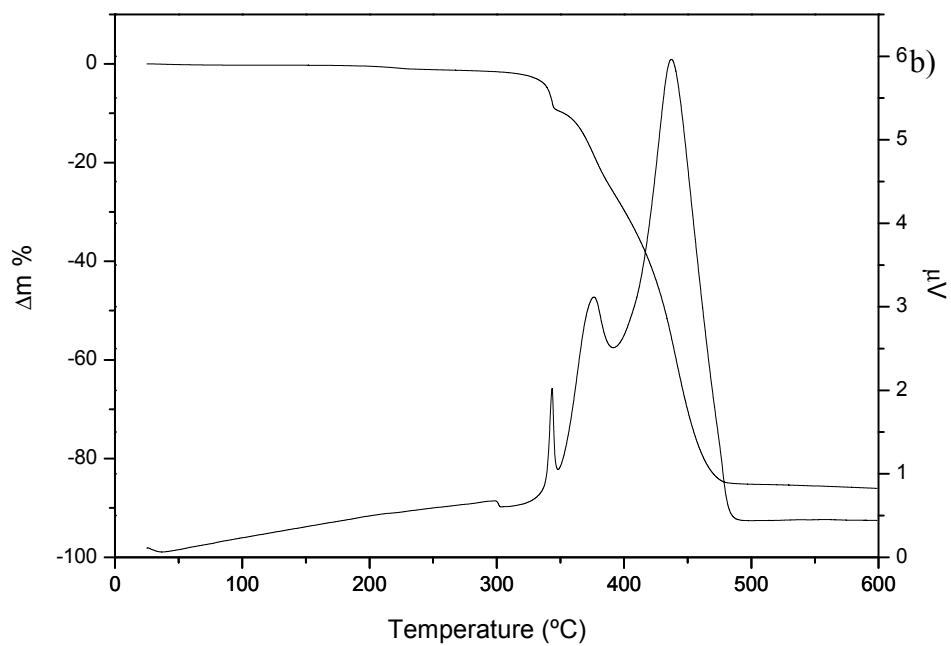

**Figure S9.** TGA/DTA curves for compound **2** in the ranges of (a) 25-900 °C, heating rate 10°C/min, and (b) 25-600 °C, heating rate 5°C/min.

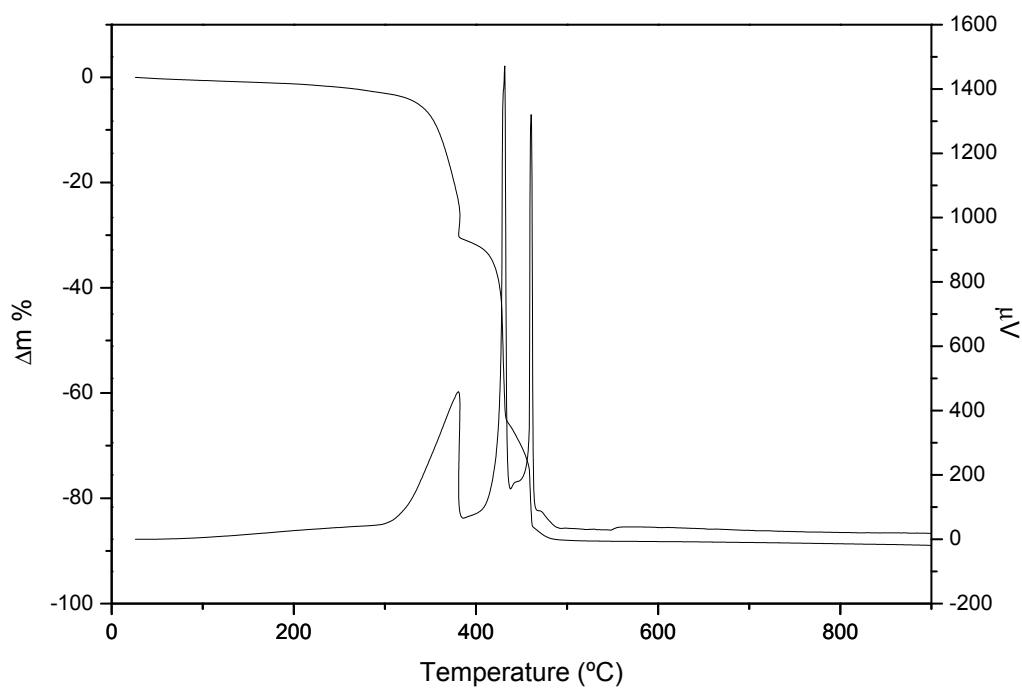

**Figure S10.** TGA/DTA curves for compound **3**.

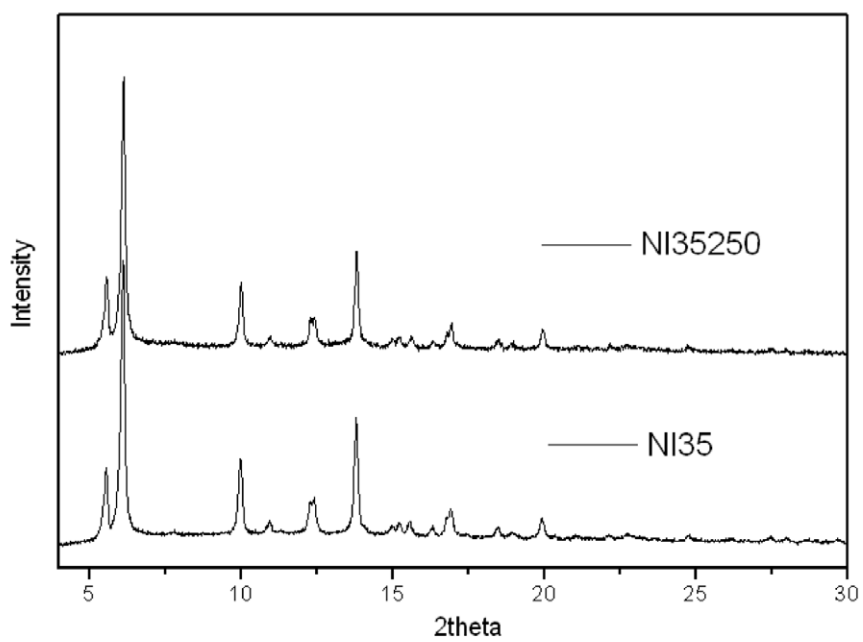

**Figure S11.** XRPD of structure type **1** as synthesized and after heating up to 250° C (for Ni compound)

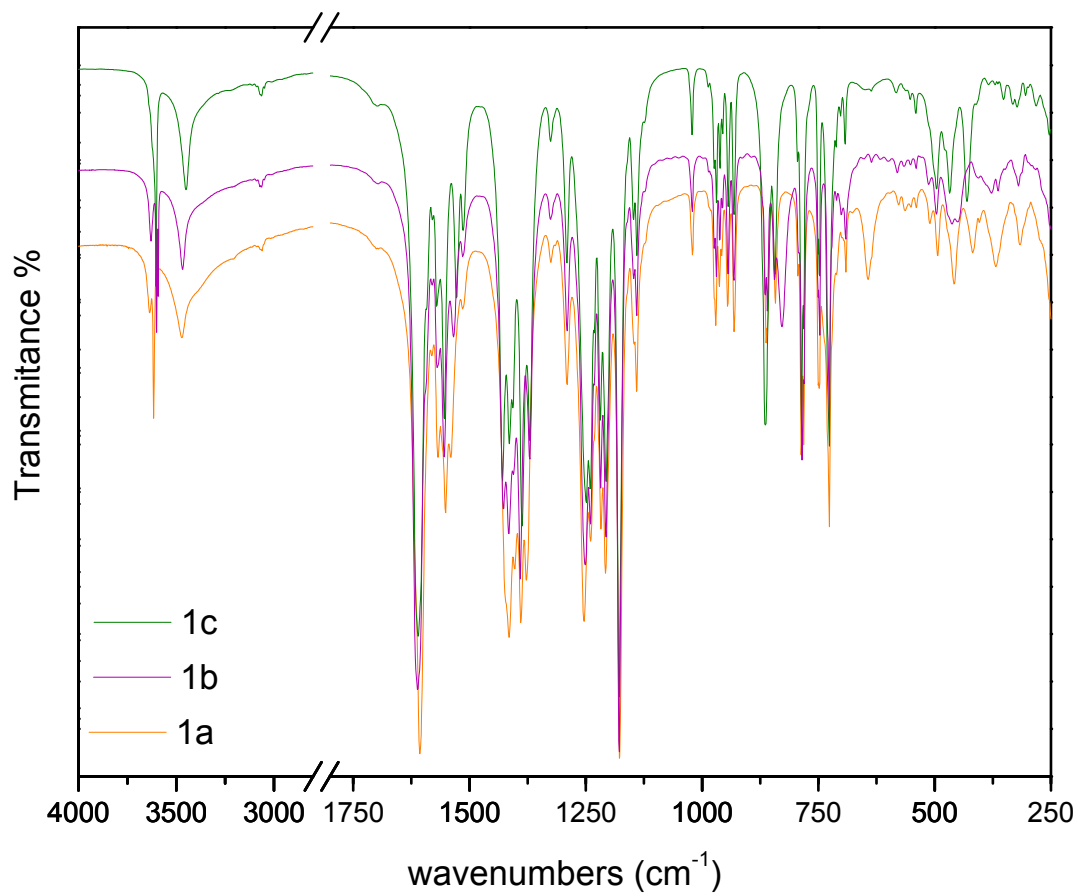

**Figure S12.** FTIR spectra of compounds **1a-c**.

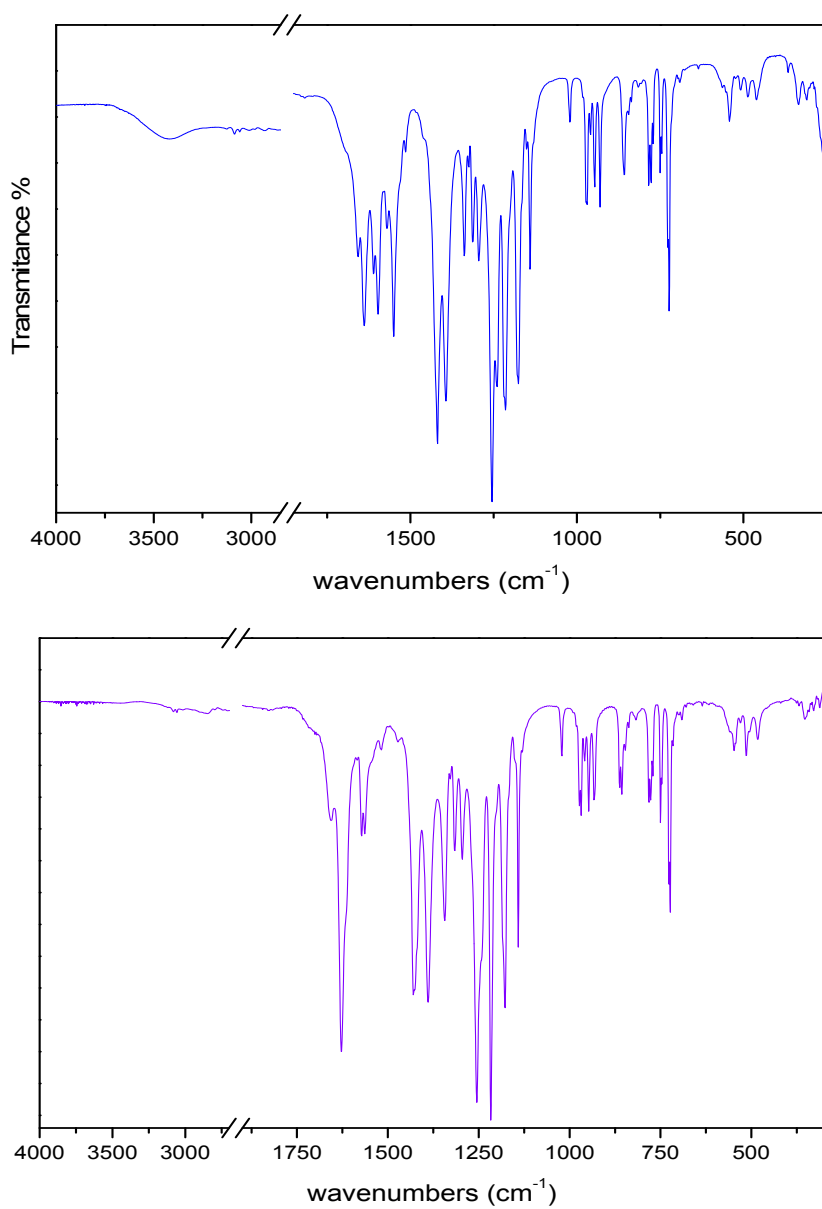

**Figure S13.** FTIR spectra of compounds **2** (up) and **3** (down).
